# Supplementary material
Source: publisher figshare collection journal article supplement (https://frontiersin.figshare.com/ndownloader/files/22330233)

# Supplementary Material

## Supplementary file 4

IL6 and CHI3L1 RNA expression (A) in glioma WHO grade II-IV tumor tissue from the TCGA dataset, downloaded from <http://gliovis.bioinfo.cnio.es/> (Bowman et al., 2017). (B) Pretreatment plasma IL-6 and YKL-40 in patients with newly diagnosed glioblastoma (Cohort 2) versus recurrent glioblastoma (Cohort 3). (C) Plasma IL-6 and YKL-40 in paired samples from initial GBM surgery and at first recurrence (Cohort 4). GBM, glioblastoma; IDHmut-codel, IDH mutated 1p-19q codeleted; IDHmut-non-codel, IDH mutated 1p-19q non codeleted; IDHwt, IDH wildtype

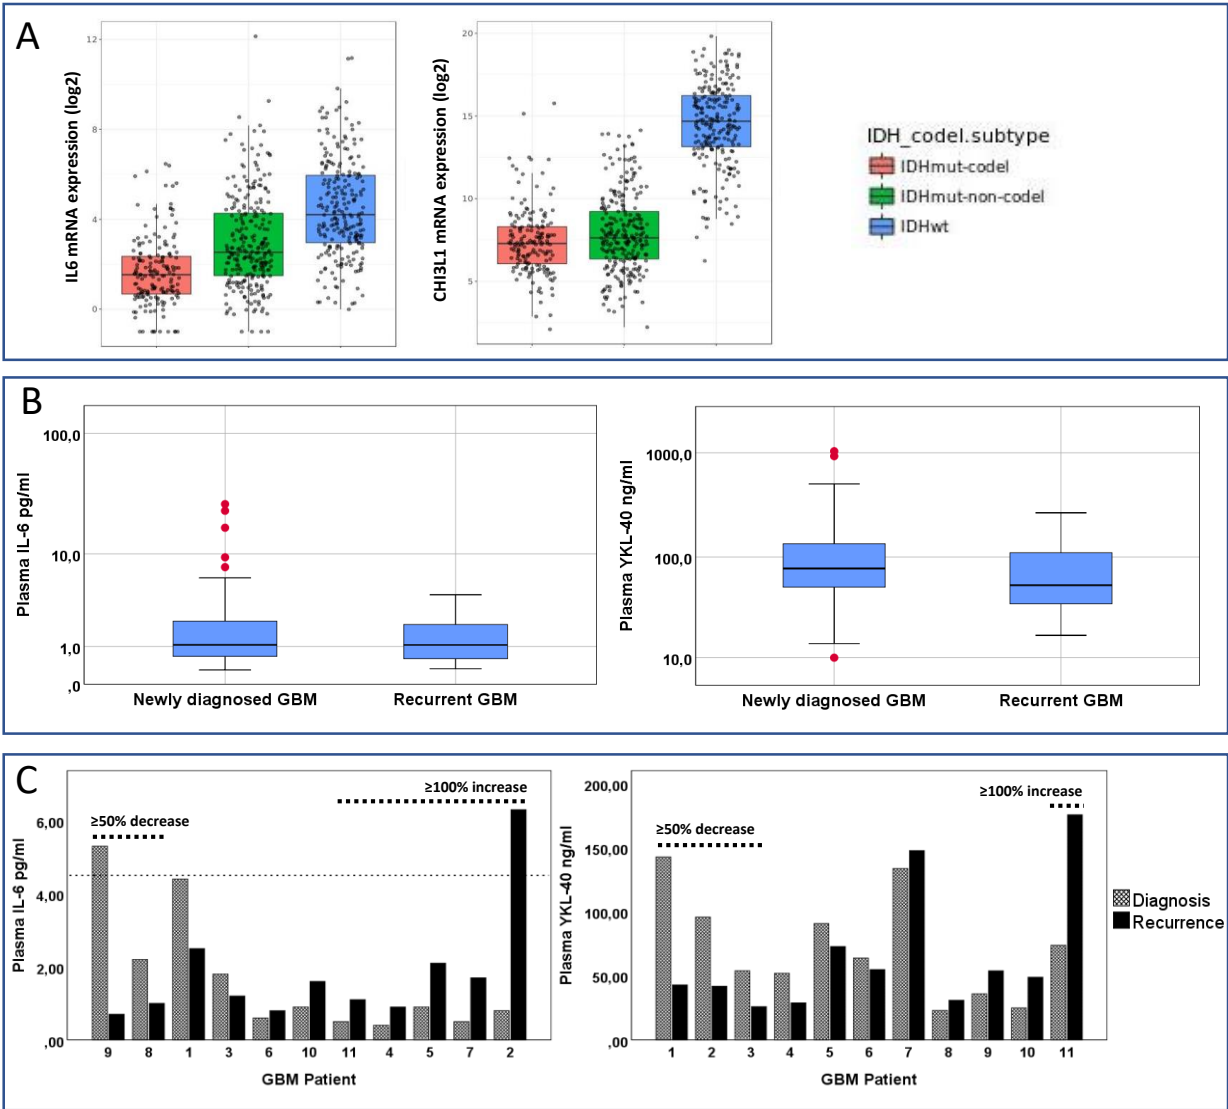

Supplement: Supplementary file [file 22330233]
